# Supplementary material
Source: PubMed Central journal article supplement (PMC3112550)
Supplement: tjp0589-2719-SD1.pdf [file tjp0589-2719-SD1.pdf]

## Supplemental Information

1)  $\Delta F508$ -CFTR expressed in CFPAC-1 epithelial cells also demonstrates unstable full and partial NBD dimers.

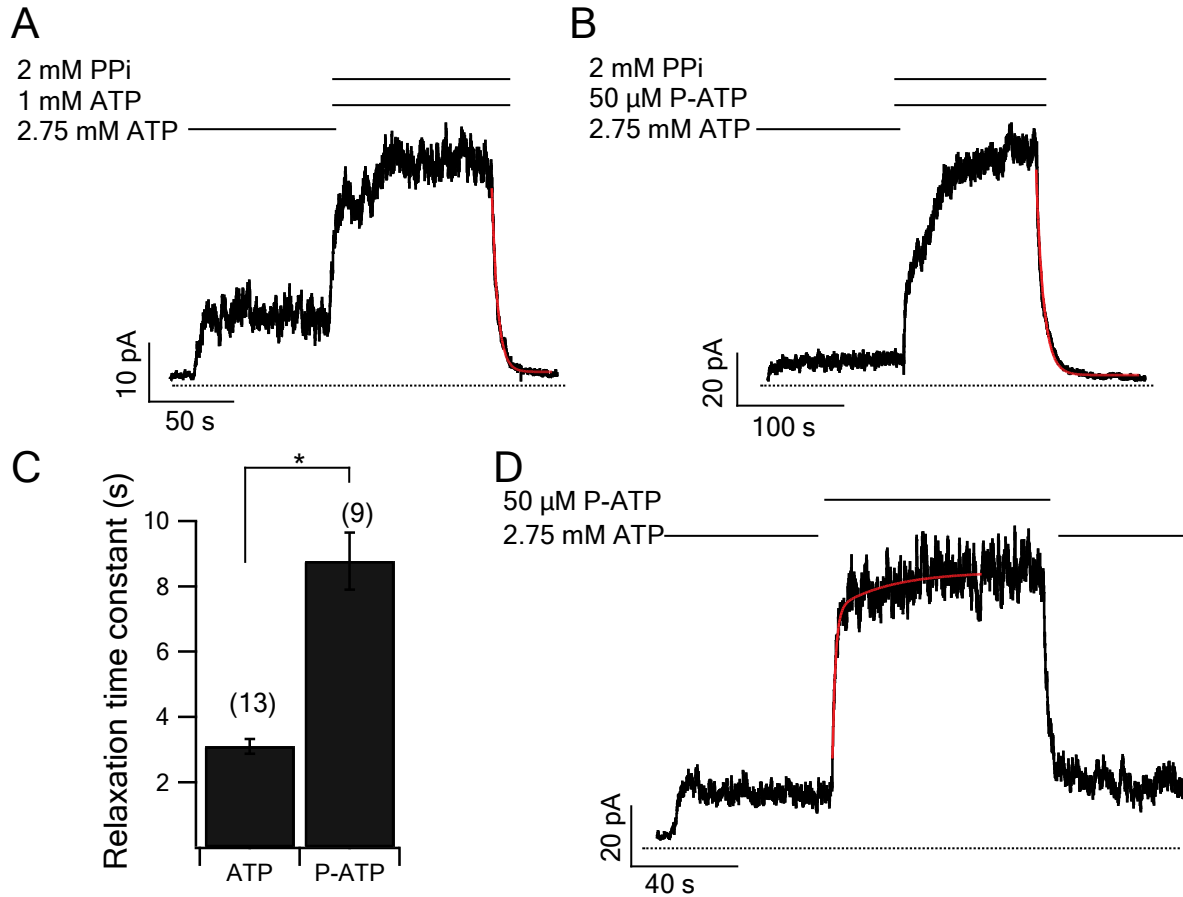

**Figure S1.** Properties of  $\Delta F508$ -CFTR expressed in CFPAC-1 cells. **A.** A representative current trace of  $\Delta F508$ -CFTR in the presence of 1 mM ATP and 2 mMPP<sub>i</sub> (n = 13). **B.** A representative trace of  $\Delta F508$ -CFTR locked open by 50  $\mu$ M P-ATP and 2 mMPP<sub>i</sub> (n = 9).**C.** Summary of the relaxation time constant ( $\tau$ ) for PP<sub>i</sub>-locked open  $\Delta F508$ -CFTR with P-ATP or ATP. \*, P < 0.01.**D.** A representative current trace of  $\Delta F508$ -CFTR for the ATP/P-ATP ligand exchange experiment (Slow phase:  $\tau = 5.93 \pm 1.1$  s; fast phase:  $\tau = 0.85 \pm 0.13$  s (n = 9)).

## 2) Western Blot analysis of WT or mutant CFTR expression:

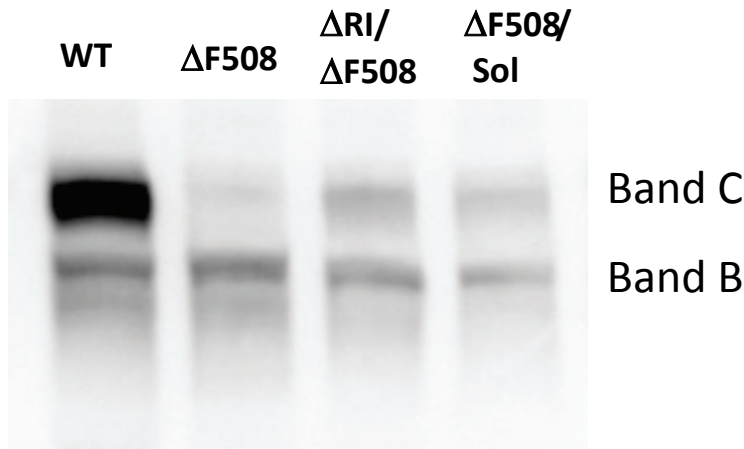

**Figure S2:** Western blot analysis for WT,  $\Delta$ F508,  $\Delta$ RI/ $\Delta$ F508 and  $\Delta$ F508/Sol ( $\Delta$ F508/F494N/Q637R) incubated at 37 °C. Mature fully-glycosylated CFTR and core-glycosylated CFTR are labeled as Band C and Band B, respectively. N = 3.

**Western Blot:** Transfected cells from confluent 35-mm dishes were washed with PBS and were lysed in 1x Laemmli sample buffer. DNA was sheared by brief sonication. Whole cell lysates were separated on 7.5% Tris-HCl Ready gel (Bio-Rad, Hercules, CA) and transferred onto a nitrocellulose membrane. The membrane was blocked with 5% milk in TBST buffer (20 mM Tris, 137 mM NaCl, 0.05% Tween) at 4°C overnight and then probed with primary antibody against CFTR (clone M3A7, Chemicon, Temecula, CA) in TBST at 4°C overnight. The membrane was washed with TBST three times and then incubated with the horseradish peroxidase-conjugated secondary antibody (donkey anti-mouse IgG; Jackson Immuno Research Laboratories, West Grove, PA) for 2 h at room temperature. The membrane was developed with chemiluminescence reagent (Pierce, Rockford, IL) and the image was acquired by ChemiDoc XRS+ system (BioRad, Hercules, CA).
